# Supplementary material for: Cross-metathesis reactions of vinyl-chlorins and -porphyrins catalyzed by a “second generation” Grubbs' catalyst
Source: Royal Society of Chemistry journal article supplement (doi:10.1039/b400001c), 2004-01-01
Supplement: b400001c.doc [file b400001c.doc]

Cross-Metathesis reactions of vinyl-chlorins and -porphyrins catalyzed by a “second generation” Grubbs’ catalyst

Xin Liu, Ethan Sternberg and David Dolphin*

2036 Main Mall, Vancouver, British Columbia, Canada.

Fax: 1-604-8229678; Tel: 1-604-8224571;

E-mail: ddolphin@qltinc.com

**Supplementary Material for Chemical Communications**

**Comparison of reactivity difference between 3-vinyl and other terminal vinyl**

The reactivity difference between 3-vinyl and other terminal vinyl can be observed by the following reaction: when catalyst **2** was utilized,the cross-metathesis proceeded smoothly on the “free” terminal vinyl that was far away from chlorin ring; while no reaction happened on vinyl at 3-position.

**Experimental Sections:**

THF was refluxed over Na/acetophenone under Ar2 until color changed to blue. The catalyst **3** was bought from Aldrich Chemical Co., Inc and was handled in glove box. Other commercially available reagents were used as purchased without further purification unless stated otherwise. Silica gel (BDH, 230-430 mesh) was used for column chromatography. Silica gel thin layer chromatography (TLC) was performed on glass-backed plates (Aldrich, silica gel 60, 0.25 mm). 1H NMR and 13C NMR spectroscopy were recorded on Bruker AV-300 MHz or AV-400 MHz instrument using the residual CHCl3 as a reference (δ = 7.24 ppm) unless noted otherwise. Mass spectrometry analyses were performed at the Department of Chemistry, UBC. Elemental analysis was obtained from lab in UBC on Carlo-Erba elemental analyzer 1108.

3-devinyl 3-(1-hexene) ring B-BPD-1, 3-diene dimethyl ester **4a**:

An oven-dried flask was charged with Zn-ring B-BPD-1, 3-diene dimethyl ester **Zn-4** (32 mg, 0.04mmol) and condenser. Solution of catalyst **3** (9 mg, 0.01 mmol) dissolved in freshly distilled dry THF (1 mL) was added via syringe to the flask, the mixture was stirred at room temperature. 1-hexene (67 mg, 0.1 mL, 0.8 mmol) was added by syringe to the stirring mixture immediately. Then the reaction mixture was refluxed mildly under Argon for 1 h. The solvent was removed by rotatory evaporation and the residue solid was purified by flush column chromatography by using CH2Cl2/MeOH (100:0.5) mixture. 32 mg Zn-complex of product was obtained with the isolation yield of 95 %. The solid was redissolved in 10 mL CH2Cl2 and treated by 0.5 mL trifluoroacetic acid (TFA) for 30 min at room temperature. The mixture was diluted with 20 mL CH2Cl2 and washed by 202 mL H2O, 5 % NaHCO3 solution and 202 mL H2O. After dried over MgSO4, solvent was removed; the solid was purified by flush column chromatography to give the product 3-devinyl 3-(1-hexene) ring B-BPD-1, 3-diene dimethyl ester **4a** as dark solid 29 mg in 98 % yield.

1H NMR (300 MHz, CDCl3) : 9.72, 9.67, 9.36, 9.20 (4s, 4H, H-meso), 7.82, 7.81 (d, 1H, H-74, J=5.7 Hz), 7.67, 7.63 (d, 1H, H-31 (*E*-isomer), J=15.9 Hz), 7.44, 7.43 (d, 1H, H-73, J=5.7 Hz), 6.65~6.62 (m, 1H, H-32, J1=15.9 Hz, J2=7.0 Hz), 5.05 (s, 1H, H-71), 4.29 (t, 2H, H-171, J=7.7 Hz), 4.17 (t, 2H, H-131, J=7.7 Hz), 3.97 (s, 3H, 72-CO2Me), 3.65, 3.63, 3.58, 3.46, 3.41, 2.95 (6s, 6Me, H-181, H-21, H-121, 172-CO2Me, 134-CO2Me, 71-CO2Me), 3.20~3.13 (m, 4H, H-172, H-132, J=7.7 Hz), 2.77~2.73(q, 2H, H-33, J=7.0 Hz), 1.91~1.68 (m, 4H, H-34, H-35), 1.78 (s, 3H, 7-CH3), 1.15 (t, 3H, H-36, J=7.3 Hz), -2.34 (b, 2H, 2NH)

13C NMR (75 MHz, CDCl3) : 173.7, 173.3, 170.6, 167. 6, 165.5, 156.6, 152.0 151.0, 140.1, 139.3, 138.2, 137.5, 137.3, 137.2, 136.0, 134.6, 133.8, 132.6, 131.9, 130.9, 122.0, 121.8, 112.4, 99.3, 93.4, 91.9, 52.7, 52.2, 51.7, 51.6, 51.5, 47.9, 37.0, 36.6, 34.3, 32.1, 27.5, 23.1, 22.6, 21.8, 21.5, 14.1, 12.5, 11.6, 11.2

LREIMS: m/z: 788

3-devinyl 3-(1-octene) ring B-BPD-1, 3-diene dimethyl ester **4b**:

An oven-dried flask was charged with ring B-BPD-1, 3-diene dimethyl ester **4** (30 mg, 0.04mmol) and condenser. Solution of catalyst **3** (9 mg, 0.01 mmol) dissolved in freshly distilled dry THF (1 mL) was added via syringe to the flask, the mixture was stirred at room temperature. 1-octene (90 mg, 0.12 mL, 0.8 mmol) was added by syringe to the stirring mixture immediately. Then the reaction mixture was refluxed mildly under Argon for 1 h. The solvent was removed by rotatory evaporation and the residue solid was purified by flush column chromatography by using CH2Cl2/MeOH (100:0.5) mixture. 32 mg 3-devinyl 3-(1-octene) ring B-BPD-1, 3-diene dimethyl ester **4b** was obtained with the isolation yield of 96 %.

1H NMR (300MHz, CDCl3) : 9.72, 9.67, 9.36, 9.11 (4s, 4H, H-meso), 7.84, 7.82 (d, 1H, H-74, J=5.7 Hz), 7.79, 7.73 (d, 0.98H, H-31 (*E*-isomer), J=16.1 Hz), 7.53, 7.49 (d, 0.02H, H-31 (*Z-isomer*), J=11.0 Hz), 7.46, 7.44 (d, 1H, H-73, J=5.7 Hz), 6.86~6.76 (dt, 0.98H, H-32, (*E*-isomer), J1=16.0 Hz, J2=7.0 Hz), 6.54~6.50 (dt, 0.02H, H-32, (*Z*-isomer), J1=11.0 Hz, J2=7.0 Hz), *E / Z =* 50 : 1, 5.07 (s, 1H, H-71), 4.28 (t, 2H, H-171, J=7.5 Hz), 4.18 (t, 2H, H-131, J=7.5 Hz), 3.99 (s, 3H, 72-CO2Me), 3.66, 3.63, 3.59, 3.44, 3.41, 2.96 (6s, 6Me, H-181, H-21, H-121, 172-CO2Me, 134-CO2Me, 71-CO2Me), 3.20~3.13 (2t, 4H, H-172, H-132, J=7.6 Hz), 2.80~2.73(q, 2H, H-33, J=6.9 Hz), 1.89~1.82 (m 2H, H-34), 1.74~1.64 (m, 2H, H-35), 1.53~1.44 (m, 4H, H-36, H-37), 1.79 (s, 3H, 7-CH3), 1.00 (t, 3H, H-38, J=6.9 Hz), -2.36 (b, 2H, 2NH);

13C NMR (75 MHz, CDCl3) : 173.7, 173.3, 170.6, 167.7, 165.5, 156.6, 152.0, 151.0, 140.1, 139.3, 138.2, 137.5, 137.3, 137.2, 136.0, 134.6, 133.8, 132.6, 131.8, 130.9, 121.9, 121.8, 112.4, 99.3, 98.5, 93.4, 91.9, 52.7, 52.2, 51.7, 51.6, 51.5, 37.0, 36.6, 34.7, 31.9, 29.9, 29.2, 27.5, 22.8, 21.8, 21.5, 14.2, 12.5, 11.6, 11.2

LREIMS: m/z: 816

3-devinyl 3-((6-bromo)-1-hexene) ring B-BPD-1,3-diene dimethyl ester **4c**:

Following the same procedure for the synthesis of **4a**. Zn-ring B-BPD-1, 3-diene dimethyl ester **Zn-4** (32 mg, 0.04mmol), catalyst **3** (9 mg, 0.01 mmol) and 6-bromo-1-hexene (163 mg, 0.1 mL, 0.8 mmol) were employed. 31 mg of 3-devinyl 3-((6-bromo)-1-hexene) ring B-BPD-1, 3-diene dimethyl ester **4c** was obtained after treatment with TFA to remove Zn followed by flush column chromatography, the yield was 90 %.

1H NMR (300 MHz, CDCl3) : 9.72, 9.67, 9.36, 9.09 (4s, 4H, H-meso), 7.84, 7.82 (d, 1H, H-74, J=5.7 Hz), 7.80, 7.75 (d, 1H, H-31 (*E*-isomer), J=16.1 Hz), 7.46, 7.44 (d, 1H, H-73, J=5.7 Hz), 6.83~6.73 (m, 1H, H-32, (*E*-isomer), J1=16.0 Hz, J2=7.0 Hz), 5.06 (s, 1H, H-71), 4.28 (t, 2H, H-171, J=7.6 Hz), 4.17 (t, 2H, H-131, J=7.6 Hz), 3.99 (s, 3H, 72-CO2Me), 3.68 (t, 2H, H-36, CH2Br, J=6.7 Hz), 3.66, 3.63, 3.59, 3.44, 3.41, 2.94 (6s, 6Me, H-181, H-21, H-121, 172-CO2Me, 134-CO2Me, 71-CO2Me), 3.20~3.13 (2t, 4H, H-172, H-132, J=7.6 Hz), 2.84~2.77(q, 2H, H-33, J=7.0 Hz), 2.33~2.24 (m, 2H, H-34), 2.08~2.01 (m, 2H, H-35), 1.78 (s, 3H, 7-CH3), -2.35 (b, 2H, 2NH);

13C NMR (75 MHz, CDCl3) : 173.7, 173.3, 170.6, 165.5, 156.6, 152.1, 152.0, 151.0, 140.1, 138.6, 138.3, 138.0, 137.4, 137.1, 136.1, 134.4, 133.9, 132.7, 131.5, 131.0, 123.5, 122.8, 121.8, 112.5, 99.5, 98.6, 93.4, 91.9, 52.6, 52.2, 51.7, 51.6, 51.5, 48.0, 37.0, 36.6, 33.9, 33.7, 32.6, 28.4, 27.8, 21.8, 21.5, 12.5, 11.6, 11.2

# MALDIMS: m+1/z: 868

3-devinyl 3-((1-hydroxy)-5-hexene) ring B-BPD-1, 3-diene dimethyl ester **4f**:

Following the same procedure for the synthesis of **4b**. Ring B-BPD-1, 3-diene dimethyl ester **4** (30 mg, 0.04mmol), catalyst **3** (9 mg, 0.01 mmol) and 1-hydroxy-5-hexene (82 mg, 0.1 mL, 0.8 mmol) were employed. The reaction mixture was purified by preparative TLC plates to give 2 mg 3-devinyl 3-((1-hydroxy)-5-hexene) ring B-BPD-1, 3-diene dimethyl ester **4f** with the yield of 5 %.

1H NMR (400 MHz, CDCl3) : 9.72, 9.68, 9.36, 9.10 (4s, 4H, H-meso), 7.81, 7.80 (d, 1H, H-74, J=5.6 Hz), 7.71, 7.67 (d, 1H, H-31 (*E*-isomer), J=16.0 Hz), 7.43, 7.42 (d, 1H, H-73, J=5.6 Hz), 6.84~6.77 (m, 1H, H-32, (*E*-isomer), J1=16.0 Hz, J2=7.0 Hz), 5.03 (s, 1H, H-71), 4.31 (t, 2H, H-171, J=7.5 Hz), 4.17 (t, 2H, H-131, J=7.5 Hz), 3.97 (s, 3H, 72-CO2Me), 3.93 (t, 2H, H-36, CH2OH, J=6.2 Hz), 3.64, 3.62, 3.56, 3.47, 3.40, 2.87 (6s, 6Me, H-181, H-21, H-121, 172-CO2Me, 134-CO2Me, 71-CO2Me), 3.20~3.12 (2t, 4H, H-172, H-132, J=7.5 Hz), 2.81~2.77(q, 2H, H-33, J=7.0 Hz), 1.9~2.1 (m, 4H, H-34, H-35), 1.75 (s, 3H, 7-CH3), -2.35 (b, 2H, 2NH).

# LREIMS: m/z: 804

3-devinyl 3-((1-benzyloxy)-4-pentene) ring B-BPD-1, 3-diene dimethyl ester **4g**:

Following the same procedure for the synthesis of **4b**. Ring B-BPD-1, 3-diene dimethyl ester **4** (30 mg, 0.04mmol), catalyst **3** (9 mg, 0.01 mmol) and 1-benzyloxy-4-pentene (144 mg, 0.15 mL, 0.8 mmol) were employed. The reaction mixture was purified by preparative TLC plates to give 4 mg 3-devinyl 3-((1-benzyloxy)-4-pentene) ring B-BPD-1, 3-diene dimethyl ester **4g** with the yield of 10 %.

1H NMR (300 MHz, CDCl3) : 9.72, 9.67, 9.35, 9.06 (4s, 4H, H-meso), 7.81, 7.79 (d, 1H, H-74, J=5.7 Hz), 7.79, 7.74 (d, 1H, H-31 (*E*-isomer), J=15.9 Hz), 7.43, 7.41 (d, 1H, H-73, J=5.7 Hz), 6.84~6.74 (2t, 1H, H-32, 31 (*E*-isomer), J1=15.9 Hz, J2=6.9 Hz), 7.46, 7.43 (d, 2H, H-a on benzene, J=8.2 Hz), 7.35 (t, 2H, H-b on benzene, J=7.3 Hz), 7.26 (t, 1H, H-c on benzene, J=7.3 Hz), 5.02 (s, 1H, H-71), 4.68 (s, 2H, OCH2Ph), 4.31 (t, 2H, H-171, J=7.5 Hz), 4.17 (t, 2H, H-131, J=7.5 Hz), 3.95 (s, 3H, 72-CO2Me), 3.64, 3.62, 3.56, 3.47, 3.41, 2.90 (6s, 6Me, H-181, H-21, H-121, 172-CO2Me, 134-CO2Me, 71-CO2Me), 3.83 (t, 2H, H-35, J=6.3 Hz), 3.18~3.14 (2t, 4H, H-172, H-132, J=7.6 Hz), 2.90~2.82 (q, 2H, H-33, J=6.9 Hz), 2.15 (m, 2H, H-34), 1.76 (s, 3H, 7-CH3), -2.38 (b, 2H, 2NH),

3-devinyl 3-((1-acetoxy)-4-pentene) ring B-BPD-1, 3-diene dimethyl ester **4h:**

Followingthe same procedure for the synthesis of **4a**. Zn-ring B-BPD-1,3-diene dimethyl ester **4** (35 mg, 0.044mmol), catalyst **3** (10 mg, 0.011 mmol) and 1-acetoxy-4-pentene (115 mg, 0.13 mL, 0.9 mmol) were utilized. The reaction mixture was purified by flush column chromatograph after treatment with TFA to remove Zn. 18 mg of 3-((1-acetoxy)-4-pentene) ring B-BPD-1, 3-diene dimethyl ester **4h** was obtained with the yield of 50%.

1H NMR (300 MHz, CDCl3) : 9.73, 9.67, 9.36, 9.09 (4s, 4H, H-meso), 7.83, 7.80 (d, 1H, H-74, J=5.6 Hz), 7.83, 7.77 (d, 1H, H-31 (*E*-isomer), J=16.2 Hz), 7.45, 7.43 (d, 1H, H-73, J=5.6 Hz), 6.80~6.75 (m, 1H, H-32, (*E*-isomer), J1=16.0 Hz, J2=7.3 Hz), 5.08 (s, 1H, H-71), 4.44 (t, 2H, H-35, CH2OAc, J=6.5 Hz), 4.29 (t, 2H, H-171, J=7.6 Hz), 4.17 (t, 2H, H-131, J=7.6 Hz), 3.97 (s, 3H, 72-CO2Me), 3.65, 3.63, 3.59, 3.45, 3.41, 2.92 (6s, 6Me, H-181, H-21, H-121, 172-CO2Me, 134-CO2Me, 71-CO2Me), 3.20~3.13 (2t, 4H, H-172, H-132, J=7.6 Hz), 2.88~2.80(q, 2H, H-33, J=7.3 Hz), 2.25~2.19 (m, 2H, H-34), 2.19 (s, 3H, OCOCH3), 1.78 (s, 3H, 7-CH3), -2.35 (b, 2H, 2NH);

ESIMS: m+1/z: 833

CHN analysis: C: 67.96 (67.77), H: 6.31 (6.29), N: 6.58 (6.73);

3-devinyl 3-((1-acetoxy)-2-propene) ring B-BPD-1, 3-diene dimethyl ester **4i**:

Followingthe same procedure for the synthesis of **4a**. Zn-ring B-BPD-1,3-diene dimethyl ester **Zn-4** (32 mg, 0.04mmol), catalyst **3** (10 mg, 0.011 mmol) and cis-1, 4-diacetyloxy-2-butene (137mg, 0.12mL, 0.8 mmol) were employed. The reaction mixture was treated by TFA to remove Zn, and then purified by flush column chromatograph. 17 mg of 3-((1-acetyloxy)-2-propene) ring B-BPD-1, 3-diene dimethyl ester **4i** was obtained with the yield of 54 %.

1H NMR (300 MHz, CDCl3) : 9.74, 9.66, 9.34, 9.08 (4s, 4H, H-meso), 7.83, 7.82 (d, 1H, H-74, J=5.7 Hz), 8.10, 8.05 (d, 1H, H-31 (*E*-isomer), J=16.1 Hz), 7.46, 7.44 (d, 1H, H-73, J=5.7 Hz), 6.95~6.86 (m, 1H, H-32, (*E*-isomer), J1=16.1 Hz, J2=6.4 Hz), 5.26, 5.24 (d, 2H, H-33, J=6.4 Hz), 5.06 (s, 1H, H-71), 4.27 (t, 2H, H-171, J=7.8 Hz), 4.16 (t, 2H, H-131, J=7.8 Hz), 3.98 (s, 3H, 72-CO2Me), 3.65 3.63, 3.62, 3.44, 3.40, 2.96 (6s, 6Me, H-181, H-21, H-121, 172-CO2Me, 134-CO2Me, 71-CO2Me), 3.20~3.13 (2t, 4H, H-172, H-132, J=7.6 Hz), 2.32 (s, 3H, OCOCH3), 1.78 (s, 3H, 7-CH3), -2.27 (b, 2H, 2NH);

MALDIMS: m+1/z: 805

Methyl 3-devinyl 3-(1-hexene)-pyropheophorbide **5a**:

An oven-dried flask was charged with methyl pyropheophorbide **5** (27 mg, 0.049mmol) and condenser. Solution of catalyst **3** (11 mg, 0.012 mmol) dissolved in freshly distilled dry THF (1 mL) was added via syringe to the flask, the mixture was stirred at room temperature. 1-hexene (80 mg, 0.12 mL, 0.96 mmol) was added by syringe to the stirring mixture immediately. The reaction mixture was refluxed mildly under Argon for 1 h. The solvent was removed by rotatory evaporation and the residue solid was purified by flush column chromatography by using CH2Cl2/MeOH (100:0.3) mixture. 28 mg methyl 3-devinyl-3-(1-hexene) pyropheophorbide **5a** was obtained with the isolation yield of 96 %.

1H NMR (300 MHz, CDCl3) : 9.36, 9.23, 8.47 (3s, 3H, H-meso), 7.53, 7.47 (d, 1H, H-31, (*E-isomer*), J=16.1 Hz), 6.75, 6.61 (m, 1H, H-32, (*E-isomer*), J1=16.0 Hz, J2=7.0 Hz), 5.26~5.04 (ABd, 2H, H-132), 4.48~4.41 (m, 1H, H-18), 4.26~4.24 (m, 1H, H-17), 3.63~3.56 (q, 2H, H-81, J=7.6 Hz), 3.61 (s, 3H, H-121), 3.60 (s, 3H, H-174CO2Me), 3.31 (s, 3H, H-21), 3.16 (s, 3H, H-71), 2.68~2.55 (m, 3H, Ha-171, Hb-172, Ha-33), 2.33~2.24 (m, 2H, Ha'-171, Hb'-172, Ha'-33), 1.79 (d, 3H, H-181, J=7.3 Hz), 1.65 (t, 3H, H-82, J=7.6 Hz), 1.86~1.59 (m, 4H, H-34, H-35), 1.11 (t, 3H, H-36, J=7.3 Hz), 0.48 (br s, 1H, NH), -1.70 (br s, 1H, NH)

13C NMR (75 MHz, CDCl3) : 196.1, 173.4, 171.4, 160.0, 155.2, 150.5, 149.0, 144.8, 141.9, 137.6, 136.6, 135.8, 134.7, 130.5, 127.9, 122.9, 121.6, 105.7, 103.9, 97.1, 97.0, 92.6, 51.6, 50.0, 48.0, 36.5, 34.1, 31.8, 30.9, 29.8, 23.0, 22.4, 19.4, 17.3, 14.1, 12.0, 11.9, 11.1

ESIMS: m+1/z: 605

Methyl 3-devinyl 3-(1-octene)-pyropheophorbide **5b**:

Followingthe same procedure for the synthesis of **5a**. Methyl pyropheophorbide **5** (31 mg, 0.057mmol), catalyst **3** (12 mg, 0.014 mmol) and 1-octene (127mg, 0.16mL, 1.14 mmol) were utilized. The reaction mixture was purified by flush column chromatograph. 32 mg of methyl 3-devinyl 3-(1-octene)-pyropheophorbide **5b** was obtained with the yield of 90 %.

1H NMR (400 MHz, CDCl3) : 9.37, 9.24, 8.47 (3s, 3H, H-meso), 7.53, 7.49 (d, 1H, H-31, (*E-isomer*), J=16.0 Hz), 7.34, 7.31 (d, H-31, (*Z-isomer*), J= 11.3 Hz), 6.70, 6.63 (dt, 1H, H-32, (*E-isomer*), J1=16.0 Hz, J2= 7.0 Hz), 6.50, 6.44 (dt, H-32, (*Z-isomer*), J1=11.3 Hz, J2= 7.3 Hz), *E : Z* =14 : 1, 5.25~5.05 (ABd, 2H, H-132), 4.47~4.42 (m, 1H, H-18), 4.26~4.24 (m, 1H, H-17), 3.64~3.58 (q, 2H, H-81, J=7.6 Hz), 3.61 (s, 3H, H-121), 3.60 (s, 3H, H-174CO2Me), 3.32 (s, 3H, H-21), 3.17 (s, 3H, H-71), 2.68~2.24 (m, 3H, Ha-171, Hb-172, H-33), 2.29 (m, 2H, Ha'-171, Hb'-172), 1.79 (d, 3H, H-181, J=7.3 Hz), 1.65 (t, 3H, H-82, J=7.6 Hz), 1.8~1.46 (m, 8H, H-34~H-37), 0.99 (t, 3H, H-38, J=7.0 Hz), 0.50 (br s, 1H, NH), -1.70 (br s, 1H, NH).

13C NMR (100 MHz, CDCl3) : 196.3, 173.5, 171.5, 160.1, 155.3, 150.5, 149.0, 144.9, 141.9, 140.7, 137.6, 136.6, 136.4, 135.9, 130.6, 130.2, 128.0, 121.6, 105.7, 104.0, 97.2, 92.7, 51.7, 51.6, 49.9, 47.9, 34.5, 31.9, 30.9, 29.8, 29.7, 23.1, 22.8, 19.4, 17.4, 14.2, 12.1, 12.0, 11.2

MALDIMS: m+1/z: 633

CHN analysis: C: 76.22 (75.92), H: 7.51 (7.64), N: 8.85 (9.03)

Methyl 3-devinyl 3-(1-acetoxy-2-propene)-pyropheophorbide **5c**:

Followingthe same procedure for the synthesis of **4i**. Zn-methyl pyropheophorbide **Zn-5** (26 mg, 0.042mmol), catalyst **3** (10 mg, 0.011 mmol) and *cis*-1,4-diacetoxy-2-butene (144mg, 0.13mL, 0.84 mmol) were employed. The reaction mixture was treated by TFA for 10 min to remove Zn, and then purified by preparative TLC plates. 16 mg of methyl 3-devinyl 3-(1-acetoxy-2-propene)-pyropheophorbide **5c** was obtained with the isolation yield of 60 %.

1H NMR (300 MHz, CDCl3) : 9.51, 9.34, 8.55 (3s, 3H, H-meso), 7.96, 7.91 (d, 1H, H-31, (*E-isomer*), J=16.1 Hz), 6.87, 6.78 (dt, 1H, H-32, (*E-isomer*), J1=16.0 Hz, J2=6.2 Hz), no Zisomer from NMR, 5.29~5.06 (ABd, 2H, H-132), 5.18~5.16 (d, 2H, H-33, J=6.2 Hz), 4.51~4.44 (m, 1H, H-18), 4.30~4.27 (m, 1H, H-17), 3.72~3.67 (q, 2H, H-81, J=7.7 Hz), 3.66 (s, 3H, H-121), 3.59 (s, 3H, H-174CO2Me), 3.40 (s, 3H, H-21), 3.24 (s, 3H, H-71), 2.68~2.51 (m, 2H, Ha-171, Hb-172), 2.33~2.23 (m, 2H, Ha'-171, Hb'-172), 2.27 (s, 3H, OCOCH3), 1.79 (d, 3H, H-181, J=7.3 Hz), 1.68 (t, 3H, H-82, J=7.5 Hz), 0.40 (br s, 1H, NH), -1.75 (br s, 1H, NH)

ESIMS+: m+1/z: 621.4

13C NMR (75 MHz, CDCl3) : 197.6, 174.9, 172.7, 161.8, 156.5, 152.3, 150.4, 146.5, 142.7, 139.4, 137.6, 137.4, 135.6, 133.2, 133.2, 132.1, 130.0, 127.4, 107.6, 105.6, 98.5, 94.5, 67.1, 53.2, 53.1, 51.4, 49.5, 32.3, 31.3, 24.6, 22.5, 20.9, 18.8, 13.7, 13.5, 12.6

Pyropheophorbide 5-hexene ester **7**:

Methyl pyropheophorbide **5** (20 mg, 0.036 mmol) was hydrolysed to the corresponding carboxylic acid by treatment with aqueous LiOH (1 *M*, 2 mL) in 2 mL THF. The crude acid was refluxed with CH2Cl2 for 10 min under N2. Oxalyl chloride (0.1 mL, 1.15 mmol) was added to it and the stirring continued for another 45 min. The reaction mixture was cooled and the solvent evaporated. The acid chloride so obtained was redissolved in dry CH2Cl2 (3 mL) and 5-hexene-1-ol (0.05 mL 0.4 mmol) was added. The mixture was stirred at r.t. under N2 for overnight. It was then diluted with CH2Cl2 (10 mL), rinsed with H2O, 10 % NaHCO3, H2O again. The solvent was evaporated and the excess 5-hexene-1-ol was removed under high vacuum. The product was purified on preparative TLC (CH2Cl2/MeOH, 100:0.2) to give 4 mg pyropheophorbide 5-hexene ester **7** with the yield of 18 %.

1H NMR (400 MHz, CDCl3) : 9.47, 9.37, 8.54 (3s, 3H, H-meso), 7.99 (dd, J=17.8 and 11.5 Hz, 1H, H-31), 6.27 (d, J=17.8 Hz, 1H, H-32 (E)), 6.16 (d, J=11.5 Hz, 1H, H-32 (Z)), 5.70~5.62 (m, 1H, OCH2CH2CH2CH2**CH**=CH2), 5.17 (ABd, 2H, H-132), 4.93~4.86 (m, 2H, OCH2CH2CH2CH2CH=**CH2**), 4.47 (m, 1H, H-18), 4.28 (m, 1H, H-17), 4.01~3.89 (m, 2H, O**CH2**CH2CH2CH2CH=CH2), 3.67(q, J=7.6 Hz, 2H, H-81), 3.65 (s, 3H, H-121), 3.39 (s, 3H, H-21), 3.22 (s, 3H, H-71), 2.67 (m, 1H, Ha-171), 2.53 (m, 1H, Hb-172), 2.29 (m, 2H, Ha'-171, Hb'-172), 1.94 (q, 2H, OCH2CH2CH2**CH2**CH=CH2), 1.79 (d, J=7.3 Hz, 3H, H-181), 1.68 (t, J=7.6 Hz, 3H, H-82), 1.48~1.43 (m, 2H, OCH2**CH2**CH2CH2CH=CH2) 1.31~1.26 (m, 2H, OCH2CH2**CH2**CH2CH=CH2) 0.45 (br s, 1H, NH), -1.69 (br s, 1H, NH)

LREIMS: m/z: 616

Pyropheophorbide (7-trimethylsilane)-5-heptene ester **8**:

An oven-dried flask was charged with pyropheophorbide 5-hexene ester **7** (4 mg, 0.0067mmol) and condenser. Solution of catalyst **2** (1 mg, 0.0012 mmol) dissolved in freshly distilled dry CH2Cl2 (1 mL) was added via syringe to the flask, the mixture was stirred at room temperature. Allyl trimethylsilane (1.6 mg, 0.002 mL, 0.014 mmol) was added by syringe to the stirring mixture immediately. Then the reaction mixture was refluxed mildly under Argon for 3 h. The solvent was removed by rotatory evaporation and the residue solid was purified by preparative TLC plate by using CH2Cl2/MeOH (100:0.8). 3 mg of pyropheophorbide (7-trimethylsilane)-5-heptene ester **8** was obtainedwith the isolation yield of 65 %.

1H NMR (400 MHz, CDCl3) : 9.50, 9.38, 8.54 (3s, 3H, H-meso), 7.98 (dd, J=17.8 and 11.5 Hz, 1H, H-31), 6.29 (d, J=17.8 Hz, 1H, H-32 (E)), 6.17 (d, J=11.5 Hz, 1H, H-32 (Z)), 5.30 (m, 1H, OCH2CH2CH2CH2**CH**=CHCH2TMS), 5.17 (ABd, 2H, H-132), 5.10 (m, 2H, OCH2CH2CH2CH2CH=**CH**CH2TMS), 4.47 (m, 1H, H-18), 4.28 (m, 1H, H-17), 4.01~3.90 (m, 2H, O**CH2**CH2CH2CH2CH=CHCH2TMS), 3.64(q, J=7.6 Hz, 2H, H-81), 3.66 (s, 3H, H-121), 3.39 (s, 3H, H-21), 3.23 (s, 3H, H-71), 2.64 (m, 1H, Ha-171), 2.50 (m, 1H, Hb-172), 2.27 (m, 2H, Ha'-171, Hb'-172), 1.94 (q, 2H, OCH2CH2CH2**CH2** CH=CHCH2TMS), 1.79 (d, J=7.3 Hz, 3H, H-181), 1.68 (t, J=7.6 Hz, 3H, H-82), 1.48~1.43 (m, 2H, OCH2**CH2**CH2CH2CH=CHCH2TMS), 1.40~1.58 (m, 2H, OCH2**CH2**CH2CH2CH=CHCH2TMS), 1.31~1.26 (m, 2H, OCH2CH2**CH2**CH2CH=CH CH2TMS), 0.45 (br s, 1H, NH), -0.11(s, 9H, Si(CH3)3), -1.69 (br s, 1H, NH)

LREIMS: m/z: 702
